# Supplementary material for: Nutrient Composition and Feed Hygiene of Alfalfa, Comparison of Feed Intake and Selected Metabolic Parameters in Horses Fed Alfalfa Haylage, Alfalfa Hay or Meadow Hay
Source: MDPI journal article supplement (doi:10.3390/ani14060889), 2024-03-13
Supplement: s1 [file s1]

## Supplementary files

**Table S1.** Analytical ingredients of the mineral supplement as labelled.

| Analytical Ingredients | Percentage (%) |
|------------------------|----------------|
| Crude ash              | 47             |
| Calcium                | 10             |
| Phosphorus             | 2,5            |
| Sodium                 | 3              |
| Magnesium              | 2.5            |
| Starch                 | 20             |
| Sugar                  | 5              |

**Table S2.** Urine parameters at different time periods for the feeding groups alfalfa hay (AH), alfalfa haylage (AS) and meadow hay (MH), data expressed as single values.

| Parameter<br>(in mmol/L) | Time      | AH<br>( <i>n</i> =6)              | AS<br>( <i>n</i> =5) | MH<br>( <i>n</i> =4) |
|--------------------------|-----------|-----------------------------------|----------------------|----------------------|
| Calcium                  | Day 0–10  | 50.3/60.4                         | 14.8/50.7/63.6       | 131.6                |
|                          | Day 11–21 | 21.6/69.9/77.8/99.5               | 76.3/80.7            | 29.7/37.3/127.3      |
| Phosphorus               | Day 0–10  | <LOD <sup>1</sup> /0.06           | 0.04/0.08/0.24       | 0.04                 |
|                          | Day 11–21 | <LOD <sup>1</sup> /0.02/0.02/0.04 | <LOD <sup>1</sup>    | 0.02/0.04/0.06       |
| Chlorine                 | Day 0–10  | 141/143                           | 99.2/113/148         | 116.6                |
|                          | Day 11–21 | 79.6/80.3/90.1/156                | 66.4/120             | 97.7/118/169         |
| Potassium                | Day 0–10  | 425.5/484.5                       | 168/455/470          | 390                  |
|                          | Day 11–21 | 406/423/444/500                   | 323/377              | 331/380/452          |
| Sodium                   | Day 0–10  | 14/14                             | 16/19/69             | 13                   |
|                          | Day 11–21 | 13/15/15/15                       | 11/14                | 11/13/14             |
| Creatinine               | Day 0–10  | 9.45/16.7                         | 6.25/9.40/11.2       | 8.75                 |
|                          | Day 11–21 | 8.87/10.4/11.3/18.8               | 9.49/15.1            | 11.1/11.4/12.7       |

<sup>1</sup>LOD = Limit of detection.
